# Supplementary material
Source: Springer Nature journal article supplement (https://www.springermedizin.de/resource/supplementary/13018_2013_364_MOESM7_ESM.pdf/9636866)

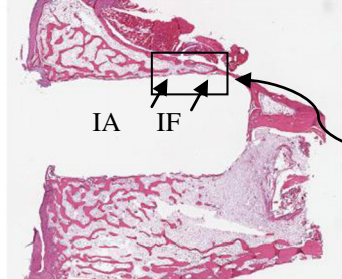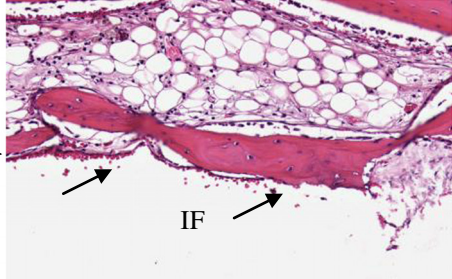

A

B

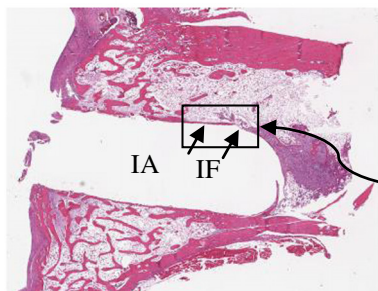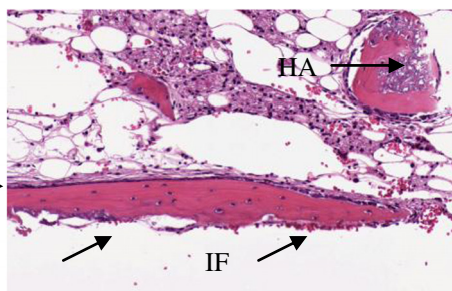

C

D

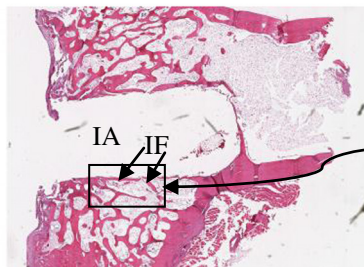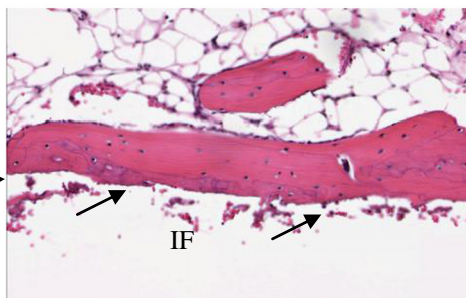

E

F

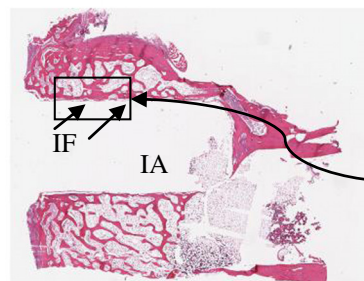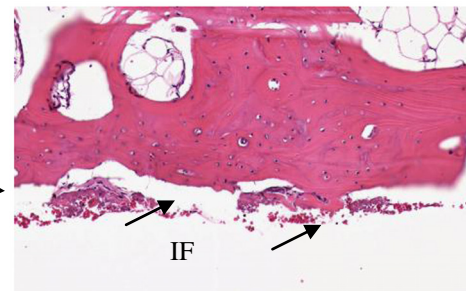

G

H

Supplement: MOESM7 [file 9636866]
